# Supplementary material for: Perfluoropolyether-incorporated polyurethane with enhanced antibacterial and anti-adhesive activities for combating catheter-induced infection
Source: Royal Society of Chemistry journal article supplement (doi:10.1039/d3ra07831k), 2024-01-01
Supplement: d3ra07831k1.pdf [file d3ra07831k1.pdf]

All of the NMR data were produced by MestRe-C and copied in their original form.

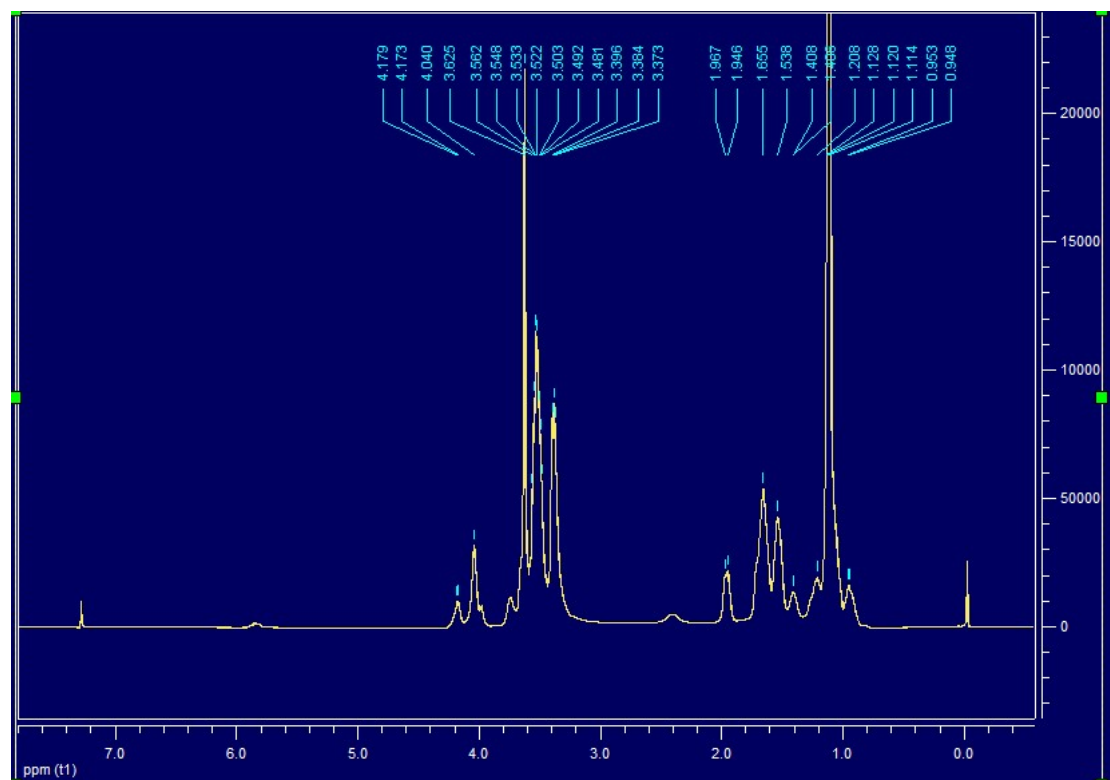

<sup>1</sup>H NMR spectrum of PFPU0

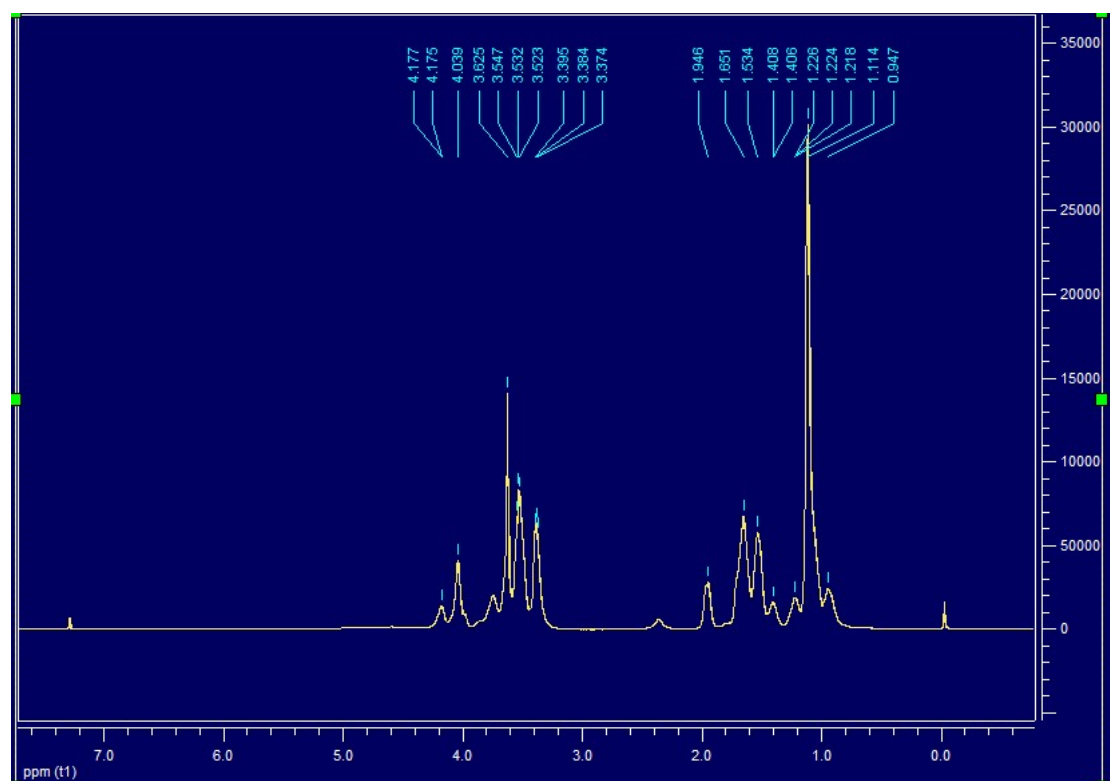

<sup>1</sup>H NMR spectrum of PFPU8

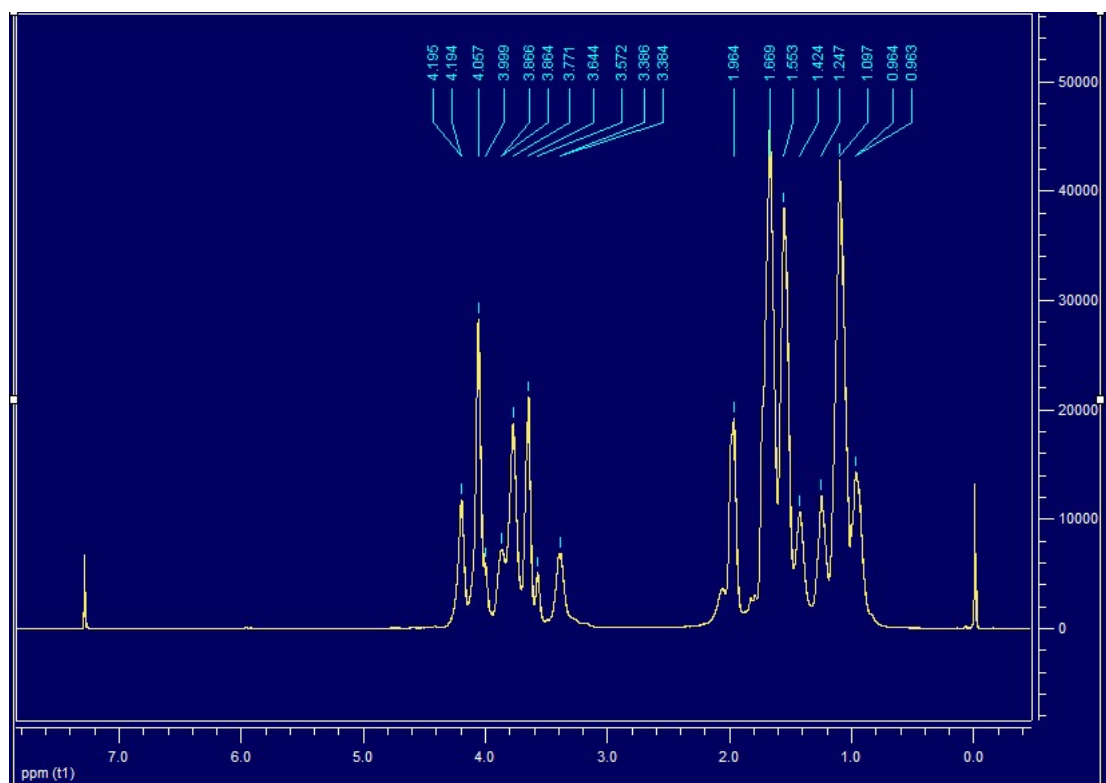

$^1\text{H}$  NMR spectrum of PFPU20
